# Supplementary material for: Biodegradation and Metabolic Pathway of the Neonicotinoid Insecticide Thiamethoxam by Labrys portucalensis F11
Source: MDPI journal article supplement (doi:10.3390/ijms232214326), 2022-11-18
Supplement: s1 [file s1]

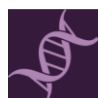

Supplementary Information

# Biodegradation and Metabolic Pathway of the Neonicotinoid Insecticide Thiamethoxam by *Labrys portucalensis* F11

Oumeima Boufercha <sup>1,2</sup>, Ana R. Monforte <sup>3</sup>, Allaoueddine Boudemagh <sup>2</sup>, António C. Ferreira <sup>3</sup>, Paula M.L. Castro <sup>3</sup> and Irina S. Moreira <sup>3\*</sup>

<sup>1</sup> Laboratory of Molecular and Cellular Biology, University of Brothers Mentouri, Constantine 1, Chaâbat Erssas Campus, Ain El Bey Road, Constantine 25000, Algeria

<sup>2</sup> Department of Microbiology, Faculty of Natural and Life Sciences, University of Brothers Mentouri, Constantine 1, Ain El Bey Road, Constantine 25000, Algeria

<sup>3</sup> CBQF—Centro de Biotecnologia e Química Fina, Laboratório Associado, Escola Superior de Biotecnologia, Universidade Católica Portuguesa, Rua Diogo Botelho 1327, 4169-005 Porto, Portugal

\* Correspondence: ismoreira@ucp.pt

**Table S1.** Growth rate of *L. portucalensis* F11 in MSM media supplemented with TMX at the concentration 10.8 mg L<sup>-1</sup>.

| TMX supplementation             | Growth rate (d <sup>-1</sup> ) | R <sup>2</sup> |
|---------------------------------|--------------------------------|----------------|
| TMX as sole carbon and nitrogen | 0.0132 ± 0.0002                | 0.9911         |
| TMX as sole carbon and sulfur   | 0.0097 ± 0.0006                | 0.9973         |
| TMX as sole carbon              | 0.0198 ± 0.0002                | 0.9844         |
| TMX + sodium acetate            | 0.0266 ± 0.0008                | 0.9943         |

**Table S2.** Growth rate of *L. portucalensis* F11 in the presence of increasing concentration of TMX.

| TMX Concentration (mg L <sup>-1</sup> ) | TMX as sole carbon source      |                | TMX with periodic feeding with acetate |                |
|-----------------------------------------|--------------------------------|----------------|----------------------------------------|----------------|
|                                         | Growth rate (d <sup>-1</sup> ) | R <sup>2</sup> | Growth rate (d <sup>-1</sup> )         | R <sup>2</sup> |
| 37.3                                    | 0.0133 ± 0.0005                | 0.9902         | 0.0274 ± 0.0003                        | 0.988          |
| 68.6                                    | 0.0056 ± 0.0002                | 0.997          | 0.0235 ± 0.0004                        | 0.9886         |
| 128.7                                   | 0.0058 ± 0.0002                | 0.9955         | 0.0155 ± 0.0007                        | 0.9856         |

**Table S3.** Growth rate of *L. portucalensis* F11 in MSM medium supplemented with periodic feeding in sodium acetate.

| MSM + sodium acetate | Growth rate (d <sup>-1</sup> ) | R <sup>2</sup> |
|----------------------|--------------------------------|----------------|
|                      | 0.0214± 0.0007                 | 0.98           |

**Table S4.** Results of toxicity tests.

| Seed germination : <i>Lactuca sativa</i>      |                       |                                    |
|-----------------------------------------------|-----------------------|------------------------------------|
| Experiment                                    | As sole carbon source | With periodic feeding with acetate |
| TMX= 10.8 mg L <sup>-1</sup>                  | No effect             | No effect                          |
| Degradation products                          | No effect             | No effect                          |
| TMX= 37.4 mg L <sup>-1</sup>                  | /                     | No effect                          |
| Degradation product                           | /                     | No effect                          |
| Bioluminescence test : <i>Vibrio fischeri</i> |                       |                                    |
| TMX= 10.8 mg L <sup>-1</sup>                  | 19%                   | 19%                                |
| Degradation product                           | 0%                    | 0%                                 |
| TMX= 37.4 mg L <sup>-1</sup>                  | /                     | 28%                                |
| Degradation product                           | /                     | 0%                                 |
| Toxi-chromo test: <i>E.coli</i>               |                       |                                    |
| TMX= 10.8 mg L <sup>-1</sup>                  | 7.4%                  | 7.4%                               |
| Degradation product                           | 0%                    | 0%                                 |
| TMX= 37.4 mg L <sup>-1</sup>                  | /                     | 12.0%                              |
| Degradation product                           | /                     | 0%                                 |

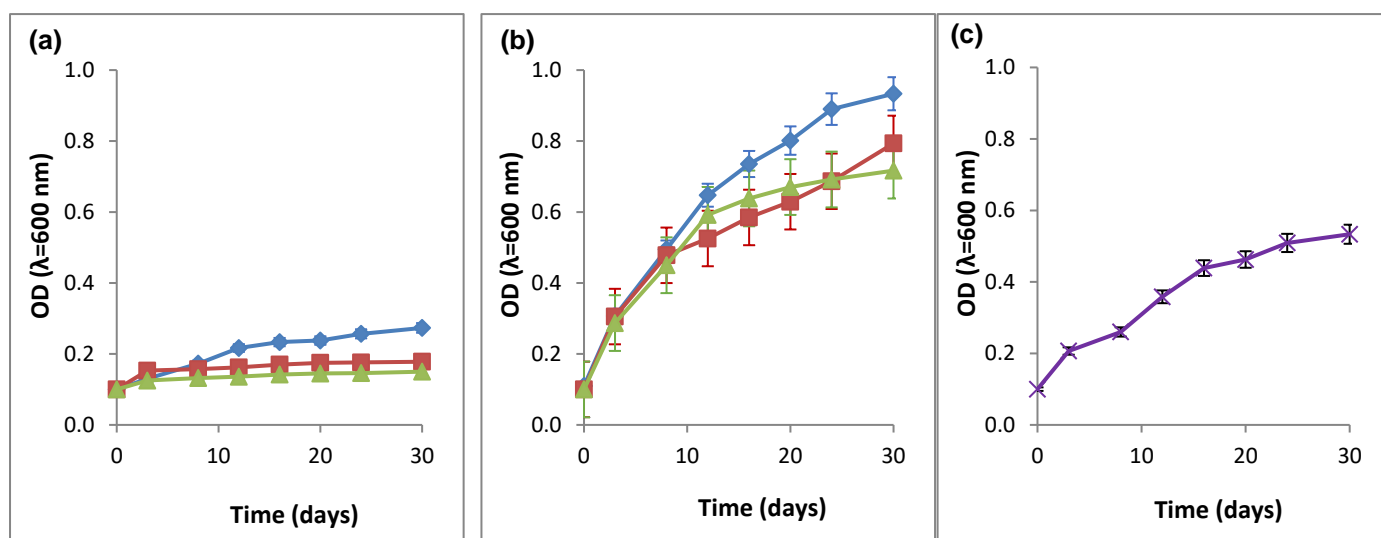

**Figure. S1.** Cell growth of *L. portucalensis* F11 during 30 days of incubation on MSM3 with TMX initial concentration: 37.4 mg L<sup>-1</sup> (♦), 68.6 mg L<sup>-1</sup> (■) and 128.7 mg L<sup>-1</sup> (▲) (a) as sole carbon source and (b) with periodic feeding on sodium acetate. (c) Cell growth of *L. portucalensis* F11 with periodic feeding on sodium acetate without TMX. Error bars presented means of three replicates ± standard deviation.

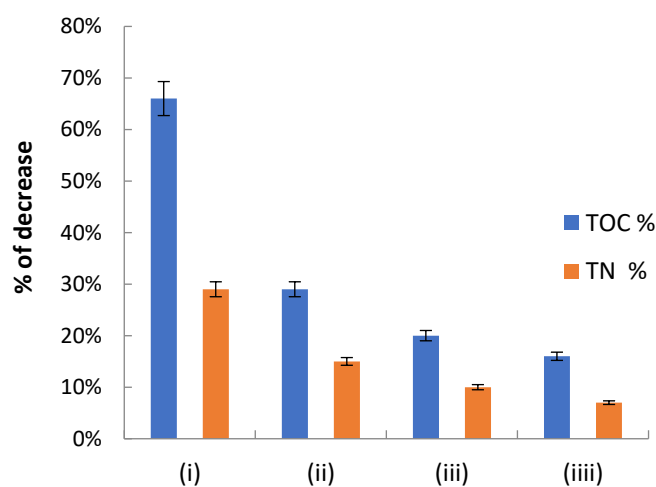

**Figure.S2.** Percentage of TOC and TN reduction during TMX degradation as sole carbon source: (i) 10.8 mg L<sup>-1</sup>, (ii) 37.4 mg L<sup>-1</sup>, (iii) 67.6 mg L<sup>-1</sup> and, (iiii) 128.7 mg L<sup>-1</sup>.

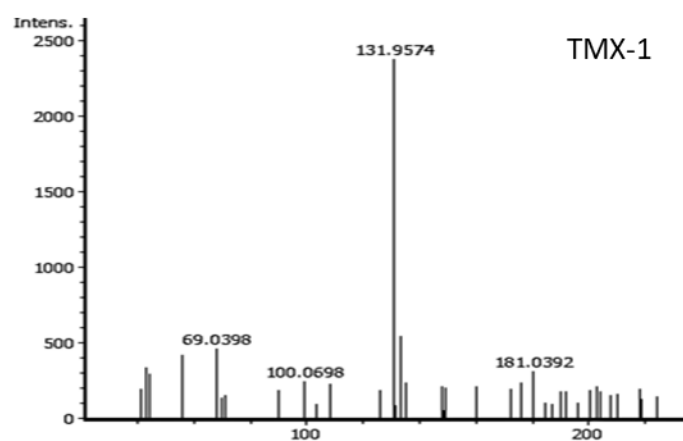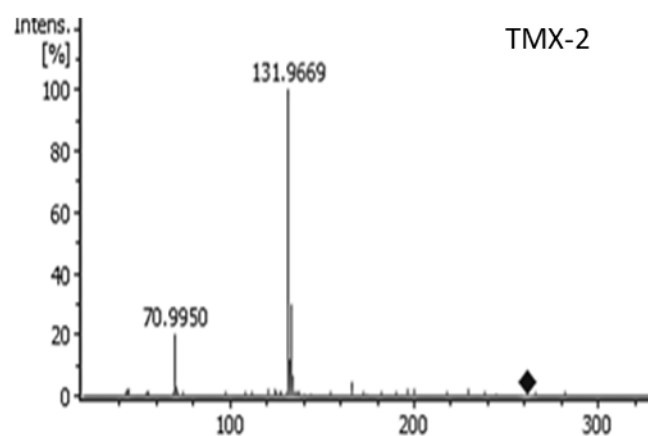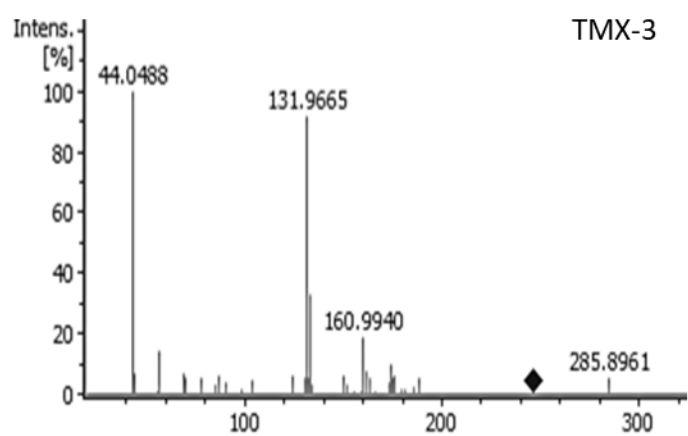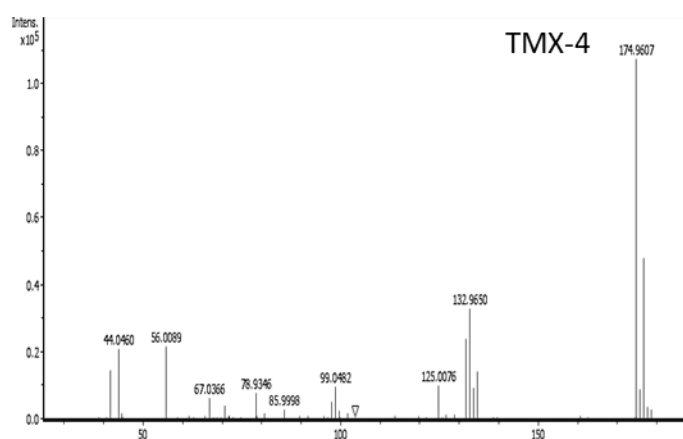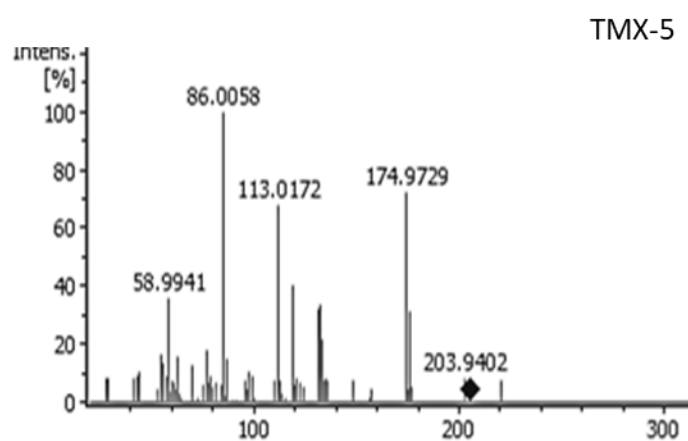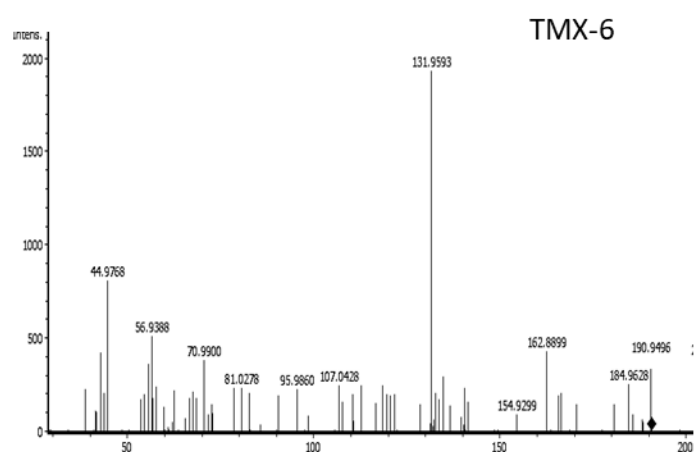

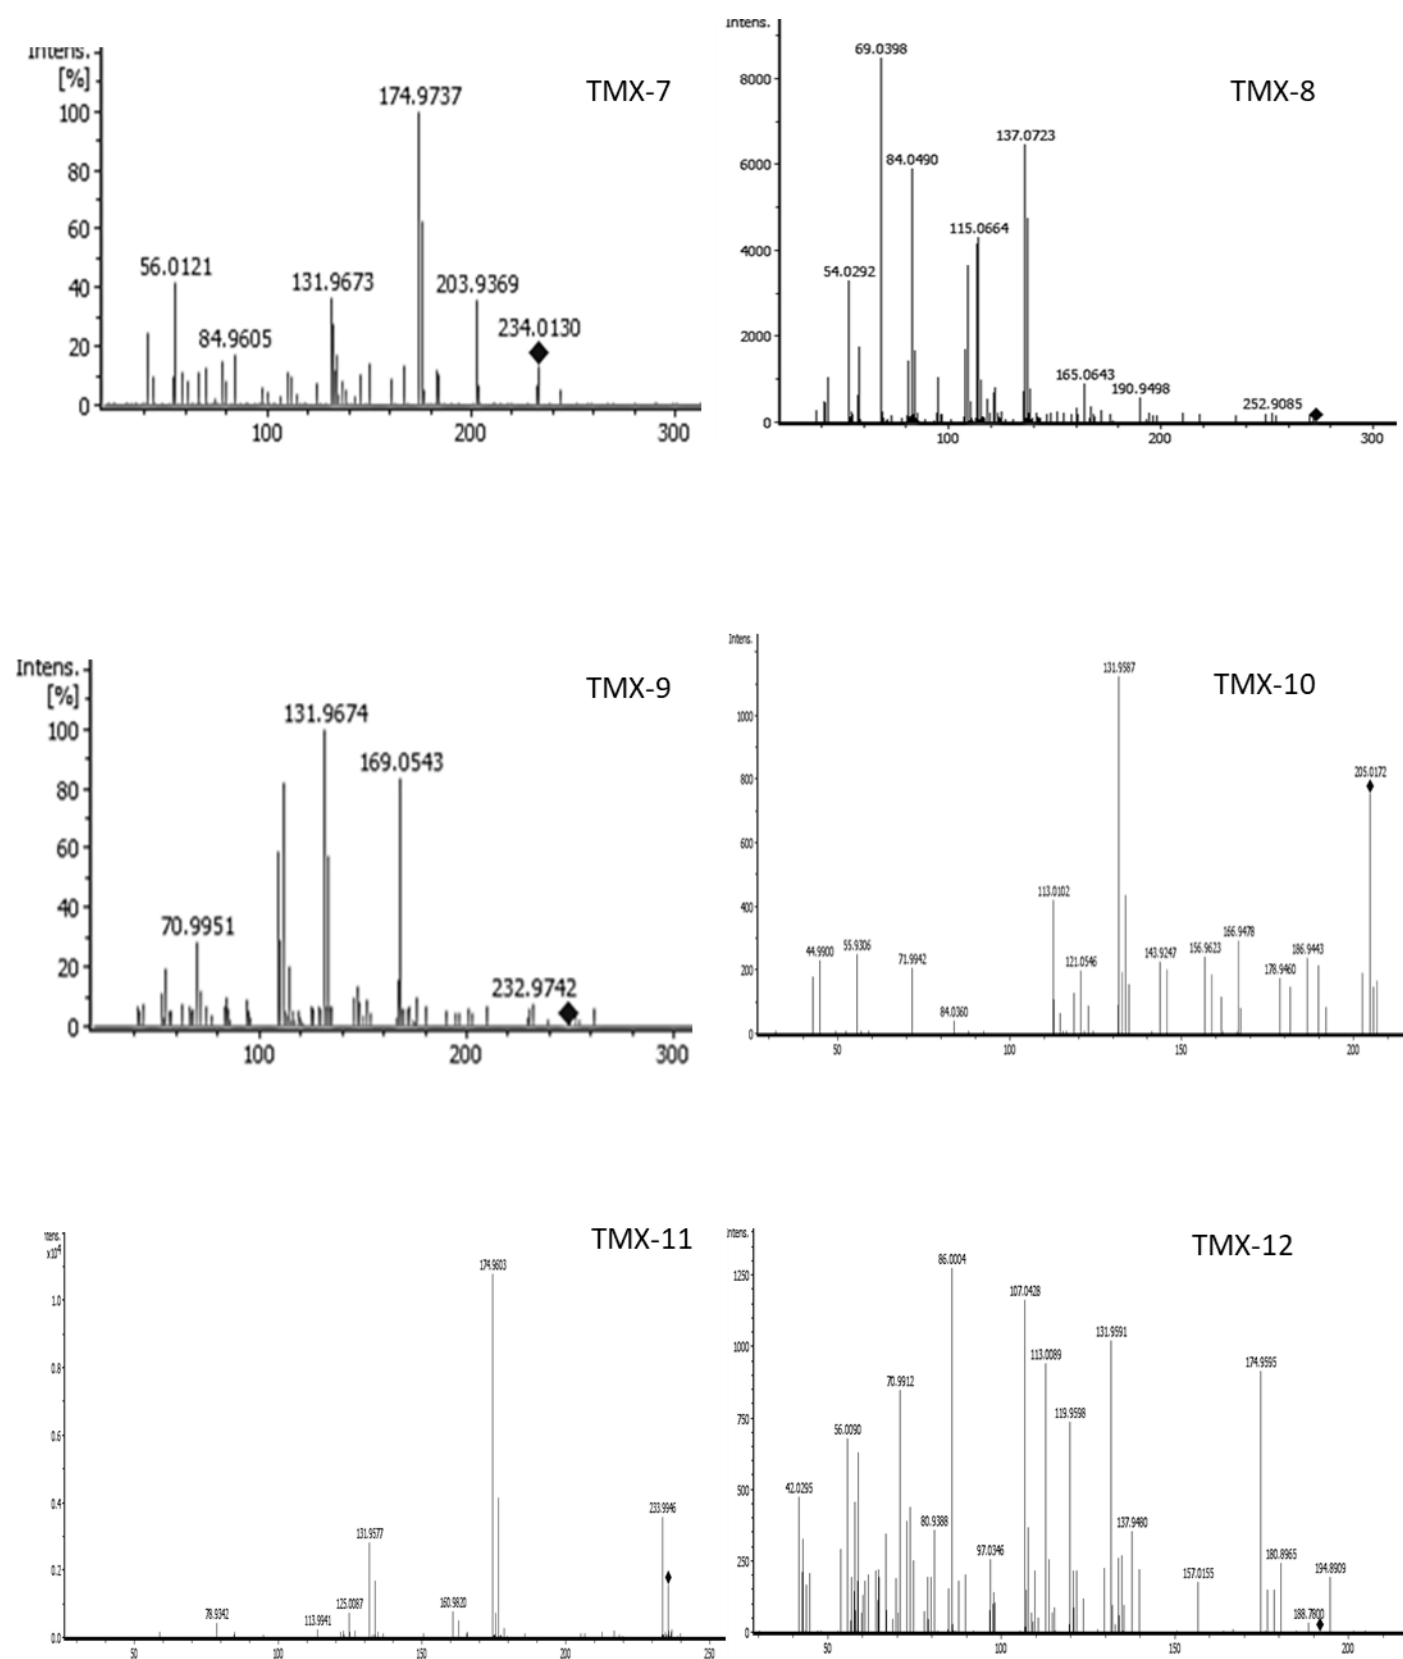

**Figure S3.** MS/MS spectra of the intermediate metabolites TMX1-TMX12.
